# Supplementary material for: Household Food Metabolism: Losses, Waste and Environmental Pressures of Food Consumption at the Regional Level in Spain
Source: MDPI journal article supplement (doi:10.3390/foods10061166), 2021-05-22
Supplement: s1 [file s1]

### **Supplementary Material**

**Di Donato, M, Carpintero, Ó. Household food metabolism: Losses, wastes and environmental pressures of food consumption at the regional level in Spain. Foods. Special Issue "Toward Sustainable Food Systems: Approaches and Strategies to Prevent and Reduce Food Loss and Waste".**

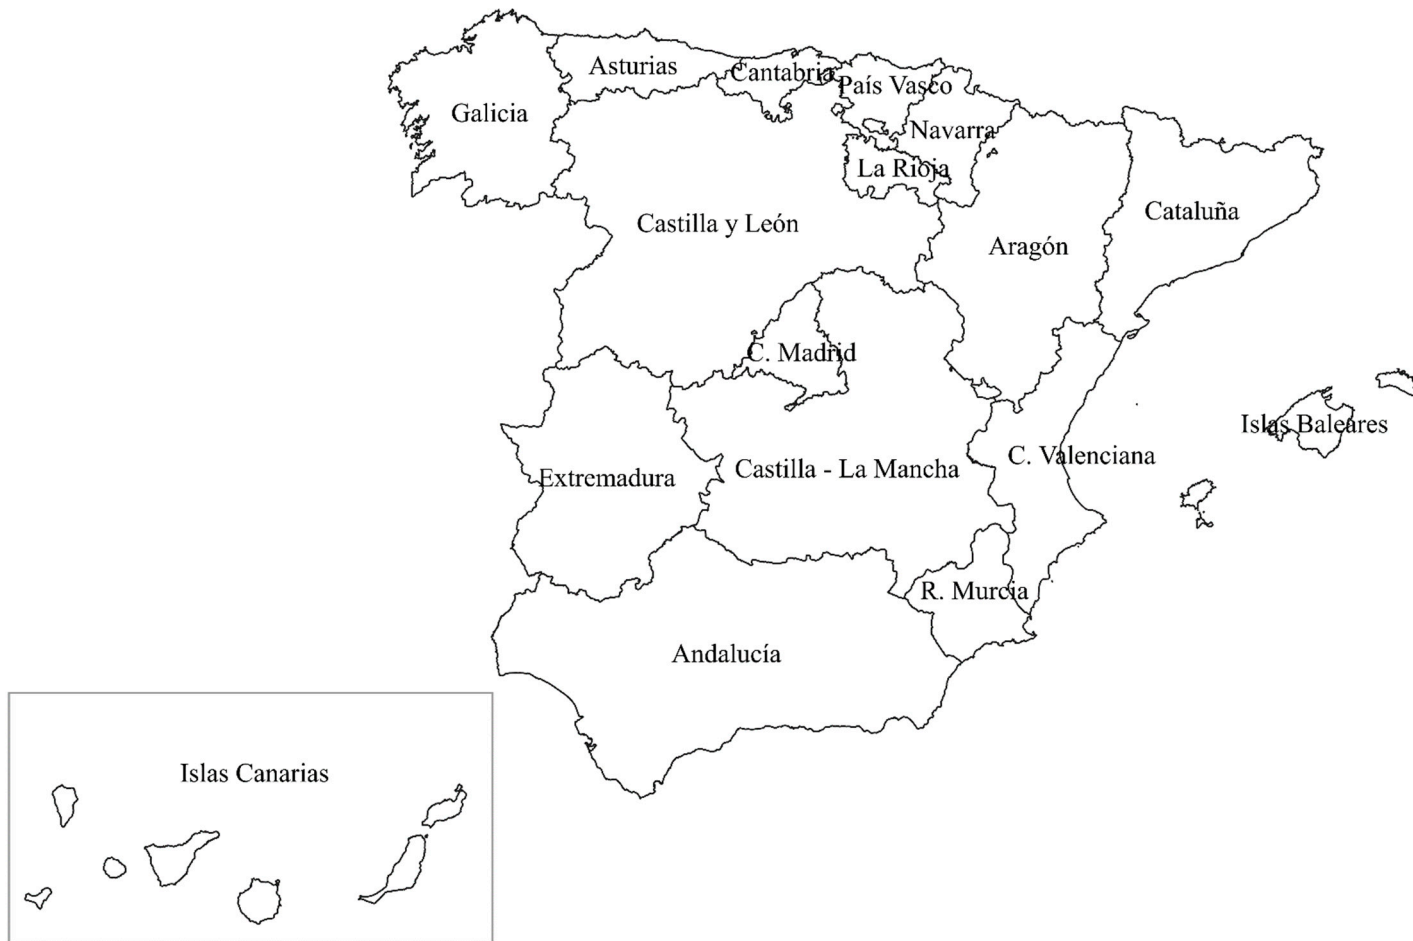

**Figure S1.** Location and name of EU NUTS-2 regions in Spain.

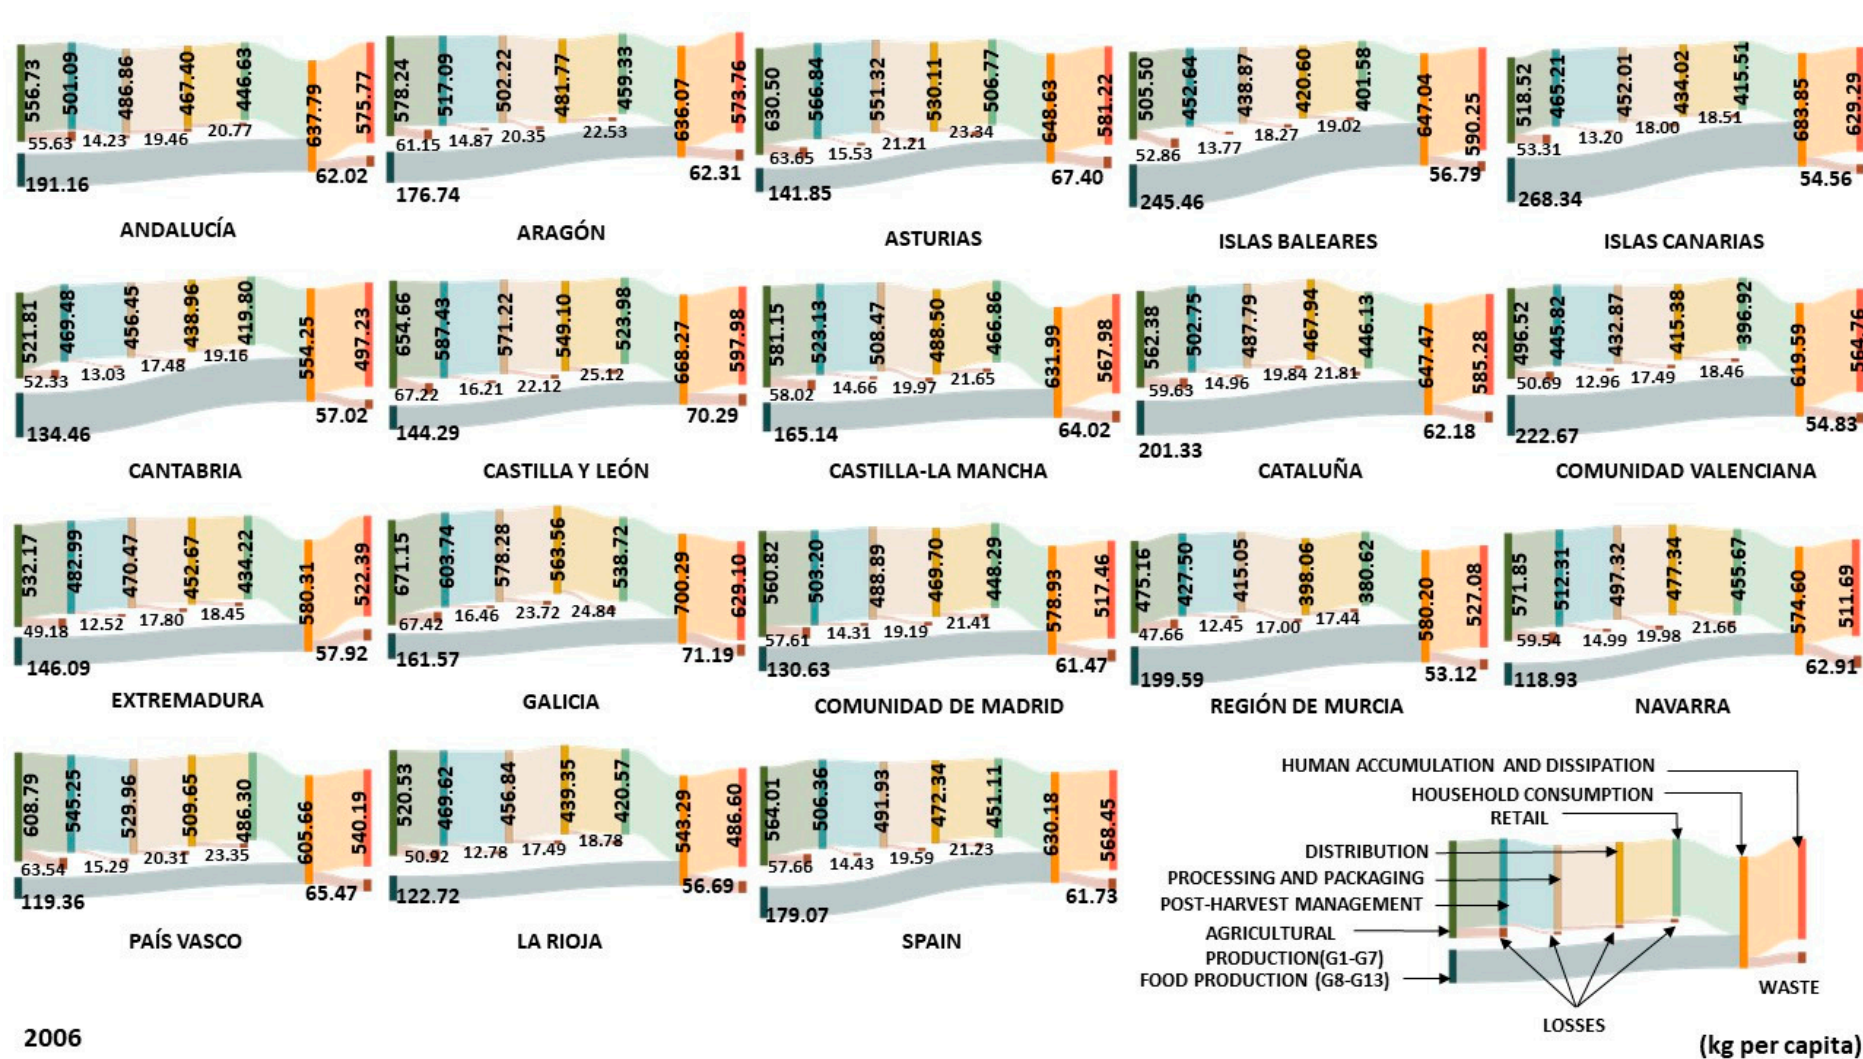

Figure S2. Distribution of losses and waste by food chain phase and NUTS-2 region in Spain (kg per capita) for 2006.

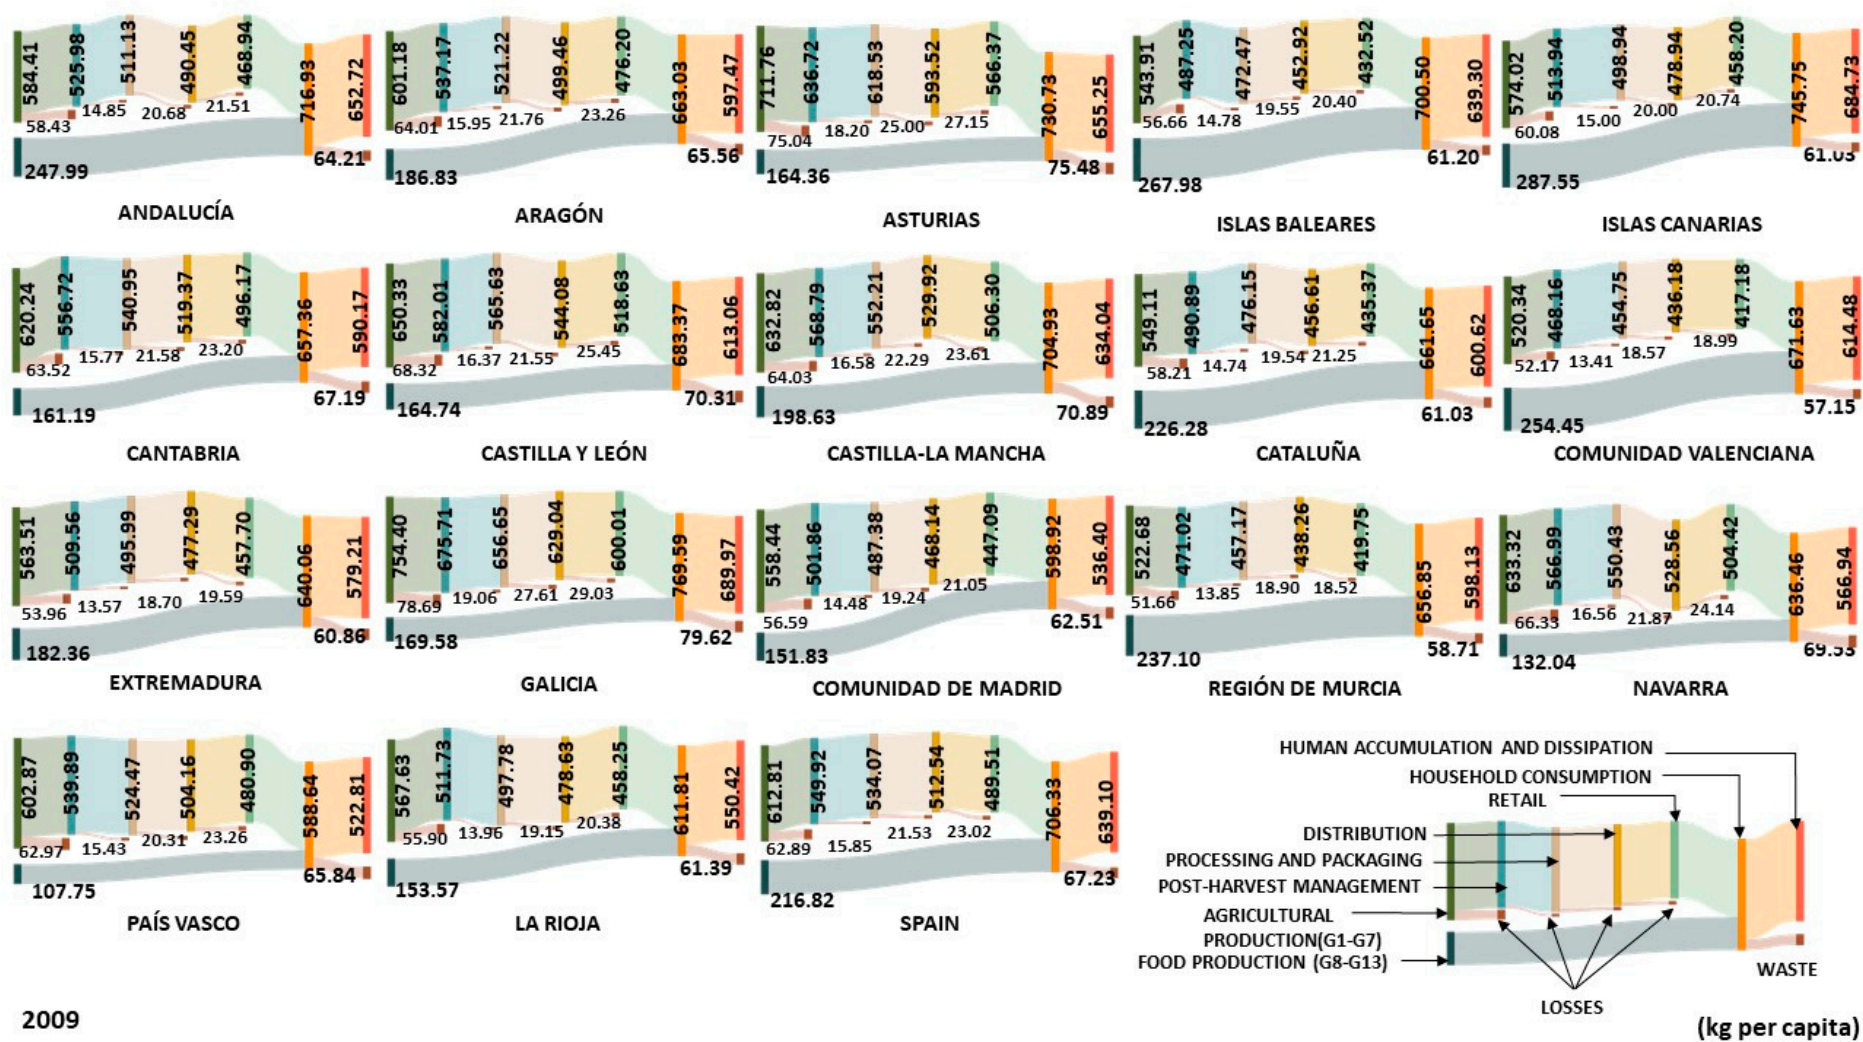

Figure S3. Distribution of losses and waste by food chain phase and NUTS-2 region in Spain (kg per capita) for 2009.



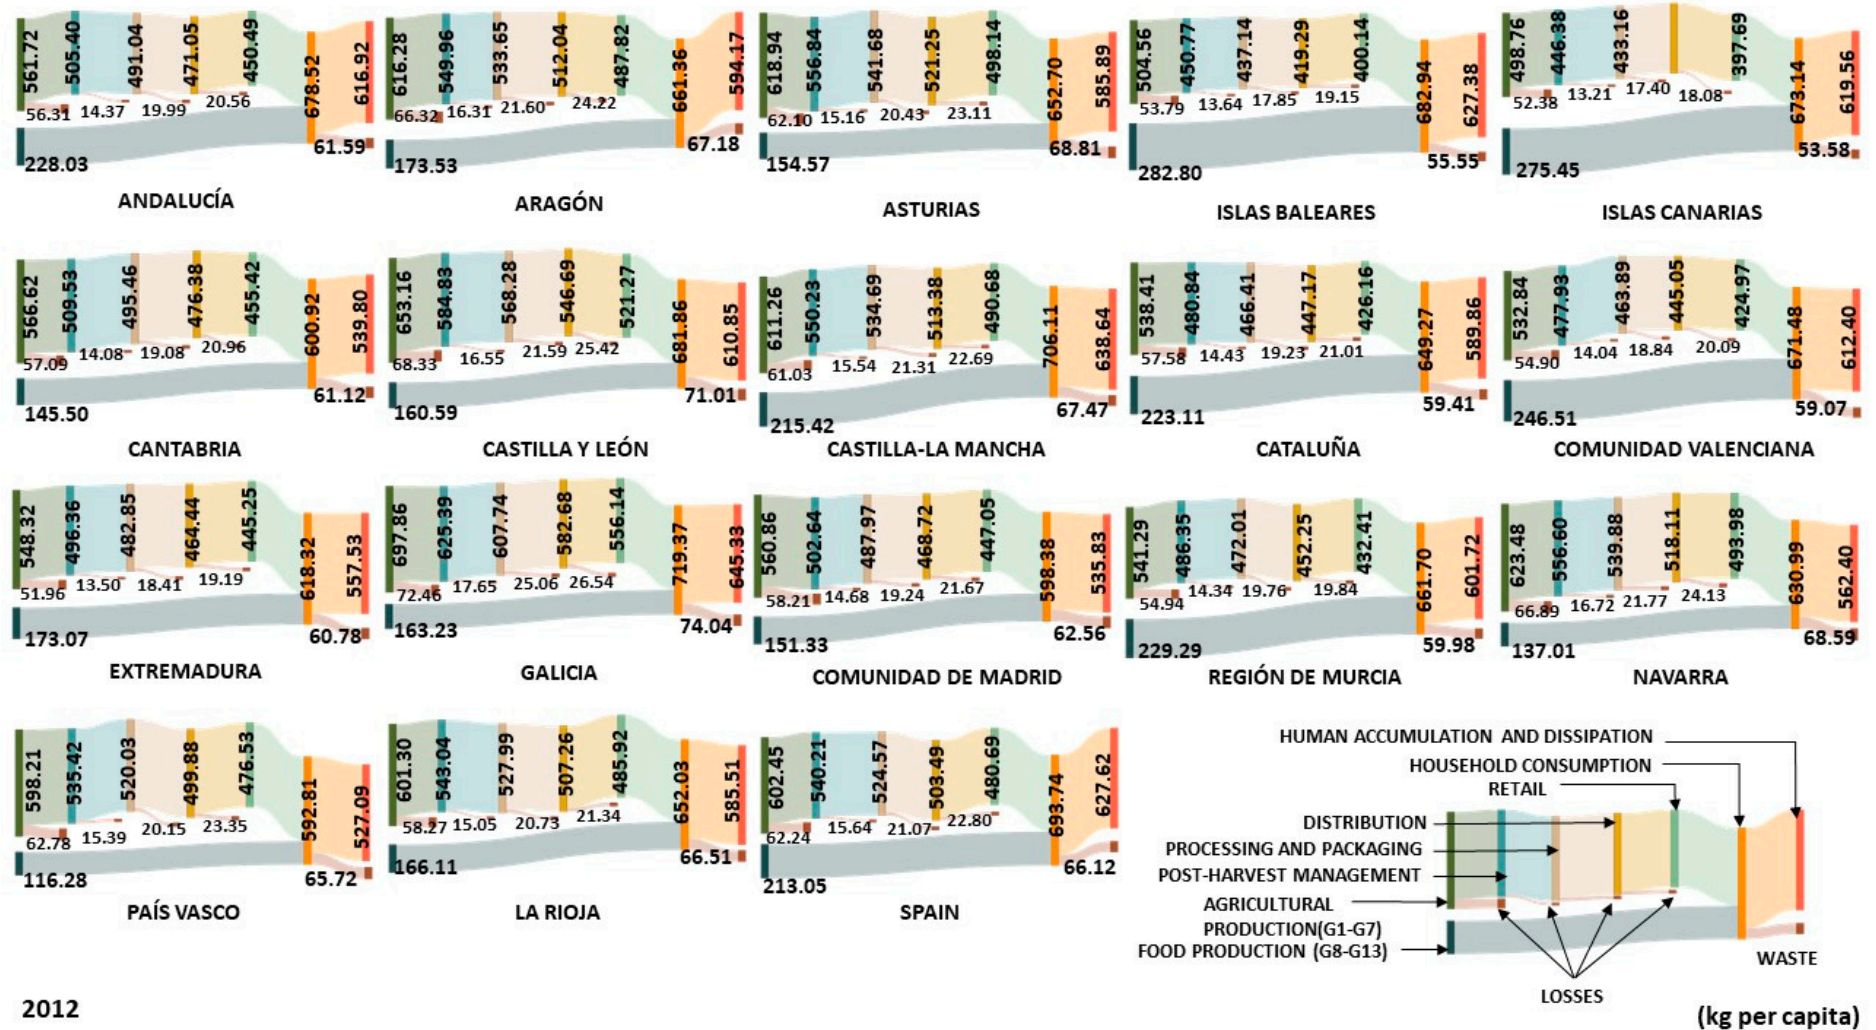

Figure S4. Distribution of losses and waste by food chain phase and NUTS-2 region in Spain (kg per capita) for 2012.

**Table S1. Some socio-economic characteristics of NUTS-2 regions in Spain**

| NUTS-2 REGION      | GDP<br>(Euros per capita) |        |        | Primary sector share<br>of GAV (%) |      |      | Balance of trade*<br>(million Euros) |          |           | Population Density<br>(population per km <sup>2</sup> ) |       |       |
|--------------------|---------------------------|--------|--------|------------------------------------|------|------|--------------------------------------|----------|-----------|---------------------------------------------------------|-------|-------|
|                    | 2006                      | 2009   | 2012   | 2006                               | 2009 | 2012 | 2006                                 | 2009     | 2012      | 2006                                                    | 2009  | 2012  |
| Andalucía          | 17,483                    | 17,573 | 16,462 | 5.3%                               | 5.1% | 5.0% | -691.2                               | -8,708.6 | 2,256.4   | 94.8                                                    | 93.2  | 89.3  |
| Aragón             | 24,239                    | 24,965 | 23,840 | 4.6%                               | 4.8% | 5.3% | -1,868.1                             | -1,941.7 | -6,503.1  | 27.5                                                    | 27.7  | 26.4  |
| Asturias           | 20,269                    | 20,941 | 19,954 | 1.9%                               | 1.3% | 1.4% | -867.9                               | -2,049.7 | -2,533.4  | 99.9                                                    | 100.5 | 99.1  |
| I.Baleares         | 25,010                    | 24,561 | 23,525 | 0.6%                               | 0.4% | 0.5% | -5,214.7                             | -5,224.8 | -6,034.5  | 219.6                                                   | 213.7 | 195.5 |
| I.Canarias         | 20,323                    | 19,810 | 18,733 | 1.6%                               | 1.7% | 1.9% | -9,230.0                             | -7,834.1 | -7,050.7  | 278.3                                                   | 269.7 | 253.7 |
| Cantabria          | 21,163                    | 21,795 | 20,585 | 2.2%                               | 1.5% | 1.6% | 128.3                                | -868.6   | -1,967.4  | 109.7                                                   | 108.9 | 105.1 |
| Castilla y León    | 20,721                    | 21,509 | 20,922 | 5.7%                               | 4.7% | 5.1% | -1,827.2                             | -834.5   | -571.0    | 26.3                                                    | 26.5  | 26.1  |
| Castilla-La Mancha | 18,132                    | 18,586 | 17,572 | 7.8%                               | 6.3% | 8.2% | -3,041.4                             | -4,176.9 | -2,345.4  | 26.0                                                    | 25.7  | 24.1  |
| Cataluña           | 26,708                    | 26,874 | 25,806 | 1.4%                               | 1.2% | 1.2% | 9,403.3                              | -7,558.7 | -14,792.1 | 230.3                                                   | 228.9 | 217.7 |
| C.Valenciana       | 20,654                    | 20,352 | 19,038 | 2.1%                               | 2.0% | 2.3% | -3,952.7                             | -8,977.9 | -9,097.8  | 213.2                                                   | 212.2 | 202.0 |
| Extremadura        | 15,128                    | 16,251 | 15,485 | 7.4%                               | 6.4% | 6.5% | -3,663.0                             | -2,222.2 | -1,876.7  | 26.1                                                    | 26.0  | 25.5  |
| Galicia            | 19,049                    | 20,333 | 19,514 | 4.9%                               | 4.5% | 5.3% | 7,073.9                              | 3,946.4  | 3,710.0   | 92.5                                                    | 92.5  | 91.1  |
| C.Madrid           | 30,124                    | 31,220 | 30,349 | 0.1%                               | 0.1% | 0.1% | -24,565.9                            | 37,998.0 | -38,718.7 | 789.7                                                   | 781.2 | 736.2 |
| R.Murcia           | 18,966                    | 19,103 | 18,141 | 4.5%                               | 3.7% | 4.5% | -4,263.4                             | -6,273.6 | -4,297.5  | 128.0                                                   | 126.2 | 118.9 |
| Navarra            | 27,925                    | 28,402 | 27,030 | 3.2%                               | 3.1% | 3.8% | 3,901.5                              | 897.9    | -323.6    | 60.7                                                    | 59.7  | 56.2  |
| País Vasco         | 28,225                    | 29,364 | 28,697 | 0.8%                               | 0.6% | 0.8% | 10,300.3                             | 1,654.0  | -1,061.0  | 298.0                                                   | 297.2 | 291.4 |
| La Rioja           | 24,307                    | 24,682 | 23,857 | 6.8%                               | 5.3% | 5.5% | -707.5                               | 191.4    | 1,119.8   | 62.4                                                    | 62.5  | 59.5  |

**Source:** GDP (Regional Accounts of Spain, INE); Primary sector share of GAV (Regional Accounts of Spain, INE); Balance of trade (DATACOMEX database, Ministry of Industry, Tourism and Trade, and C-Interreg Database); Population Density (for population data – EPF (INE); for area – Statistics yearbook (INE)).

(\*) Interregional and international flows are included.

**Table S2. Aggregation of COICOP/HBS categories used in this work.**

| <b>COICOP/HBS<br/>(4 digits)</b>  | <b>COICOP/HBS (5 digits)<br/>Categories aggregated</b>                                        |
|-----------------------------------|-----------------------------------------------------------------------------------------------|
| <b>0111 Bread and Cereals</b>     | 01111 Rice.                                                                                   |
|                                   | 01112 Bread.                                                                                  |
|                                   | 01113 Other bakery products.                                                                  |
|                                   | 01114 Pasta food.                                                                             |
| <b>0112 Meat</b>                  | 01121 Fresh, refrigerated or frozen bovine meat.                                              |
|                                   | 01122 Fresh, refrigerated or frozen pork meat.                                                |
|                                   | 01123 Fresh, refrigerated or frozen ovine and caprine meat.                                   |
|                                   | 01124 Fresh, refrigerated or frozen poultry meat.                                             |
|                                   | 01125 Repair and hire footwear.                                                               |
|                                   | 01126 Prepared meat and other products containing meat.                                       |
|                                   | 01127 Other edible meats (fresh and frozen).                                                  |
|                                   | 01128 Trimmings, fetlock joints and inferior meat cuts.                                       |
| <b>0113 Fish</b>                  | 01131 Fresh or refrigerated fish.                                                             |
|                                   | 01132 Frozen fish.                                                                            |
|                                   | 01133 Fresh, refrigerated or frozen crustacean and molluscs.                                  |
|                                   | 01134 Dry, smoked and salted fish and seafood.                                                |
|                                   | 01135 Other processed or preserved fish and seafood and food made from fish and seafood.      |
| <b>0114 Milk, cheese and eggs</b> | 01141 Full cream milk.                                                                        |
|                                   | 01142 Semi skimmed and fully skimmed milk.                                                    |
|                                   | 01143 Canned milk.                                                                            |
|                                   | 01144 Yoghurts and fermented milk.                                                            |
|                                   | 01145 Cheese and curd.                                                                        |
|                                   | 01146 Other milk-based products.                                                              |
|                                   | 01147 Eggs.                                                                                   |
| <b>0115 Oils and fats</b>         | 01151 Butter.                                                                                 |
|                                   | 01152 Margarine and other vegetable fats.                                                     |
|                                   | 01153 Olive oil.                                                                              |
|                                   | 01154 Other edible oils.                                                                      |
|                                   | 01155 Other animal fats.                                                                      |
| <b>0116 Fruit</b>                 | 01161 Citrus fruits (fresh, refrigerated or frozen).                                          |
|                                   | 01162 Bananas (fresh, refrigerated or frozen).                                                |
|                                   | 01163 Apples (fresh, refrigerated or frozen).                                                 |
|                                   | 01164 Pears (fresh, refrigerated or frozen).                                                  |
|                                   | 01165 Fruits with stones (fresh, refrigerated or frozen).                                     |
|                                   | 01166 Olives.                                                                                 |
|                                   | 01167 Berries (fresh, refrigerated or frozen).                                                |
|                                   | 01168 Other fruit (fresh, refrigerated or frozen).                                            |
|                                   | 01169 Dried fruit.                                                                            |
|                                   | 01160 Prepared fruit and fruit conserve.                                                      |
| <b>0117 Vegetables</b>            | 01171 Leaf or stalk vegetables (fresh, chilled or frozen).                                    |
|                                   | 01172 Cabbages (fresh, chilled or frozen).                                                    |
|                                   | 01173 Vegetables cultivated for their fruit (fresh, chilled or frozen).                       |
|                                   | 01174 Root crops, non-starchy bulbs and mushrooms (fresh, chilled or frozen).                 |
|                                   | 01175 Dried pulses and vegetables.                                                            |
|                                   | 01176 Frozen vegetables.                                                                      |
|                                   | 01177 Prepared or tinned pulses and vegetables and other products using pulses or vegetables. |
|                                   | 01178 Potatoes.                                                                               |
|                                   | 01179 Products derived from potatoes, tapioca and other tubes.                                |

**Table S2. Aggregation of COICOP/HBS categories used in this work (continuation).**

| <b>COICOP/HBS<br/>(4 digits)</b>                                           | <b>COICOP/HBS (5 digits)<br/>Categories aggregated</b> |                                         |
|----------------------------------------------------------------------------|--------------------------------------------------------|-----------------------------------------|
| <b>0118 Sugar, jam,<br/>honey, chocolate<br/>and confectionery</b>         | 01181                                                  | Sugar.                                  |
|                                                                            | 01182                                                  | Jam, marmalade and honey.               |
|                                                                            | 01183                                                  | Chocolate bar.                          |
|                                                                            | 01185                                                  | Ice Creams.                             |
|                                                                            | 01186                                                  | Other sugar-based products.             |
| <b>0121 Coffee, Tea and<br/>Cocoa</b>                                      | 01211                                                  | Café.                                   |
|                                                                            | 01212                                                  | Tea and infusions.                      |
|                                                                            | 01213                                                  | Cocoa.                                  |
| <b>0122 Mineral water,<br/>soft drinks, fruit and<br/>vegetable juices</b> | 01221                                                  | Mineral water.                          |
|                                                                            | 01222                                                  | Carbonated or still soft drinks.        |
|                                                                            | 01223                                                  | Fruit juices.                           |
|                                                                            | 01224                                                  | Vegetable juices.                       |
| <b>0211 Spirits and<br/>liquors</b>                                        | 02111                                                  | Spirits and liquors.                    |
| <b>0212 Wine</b>                                                           | 02121                                                  | Grape wines and other fermented fruits. |
|                                                                            | 02122                                                  | Other wines.                            |
| <b>0213 Beer</b>                                                           | 02131                                                  | Beer.                                   |



**Table S3. Coefficients used to calculate losses and waste associated to consumption of main food categories.**

|           | Consumption | Distribution | Processing and packaging | Post-harvest management | Agricultural production |
|-----------|-------------|--------------|--------------------------|-------------------------|-------------------------|
| <b>G1</b> | 25.00%      | 2.00%        | 5.00%                    | 4.00%                   | 2.00%                   |
| <b>G2</b> | 11.00%      | 4.00%        | 5.00%                    | 0.70%                   | 3.10%                   |
| <b>G3</b> | 11.00%      | 9.00%        | 6.00%                    | 0.50%                   | 9.40%                   |
| <b>G4</b> | 7.00%       | 0.50%        | 1.20%                    | 0.50%                   | 3.50%                   |
| <b>G5</b> | 4.00%       | 1.00%        | 5.00%                    | 1.00%                   | 10.00%                  |
| <b>G6</b> | 19.00%      | 10.00%       | 2.00%                    | 5.00%                   | 20.00%                  |
| <b>G7</b> | 13.33%      | 6.00%        | 7.33%                    | 5.00%                   | 16.67%                  |

**Source:** Adaptation of FAO (2011) coefficients to Spanish HBS categories.

**Note:** Annex 4 (page 26). Coefficients for Europe (including Russia). G1 = Bread and cereals; G2 = Meat; G3 = Fish and seafood; G4 = Milk, cheese and eggs; G5= Oils and fats; G6 = Fruit; G7 = Vegetables. For G7, the average of roots and tubers, oilseeds and pulses, and fruits and vegetables has been used. There were no available coefficients for categories 8-13 (the conservative assumption of no losses and waste has been adopted in this case).

**Table S4. Water footprint of 5-digit COICOP/HBS food categories used (L/kg).**

[illegible]

[illegible]

|                                                                                   |      |      |      |      |      |      |      |      |      |      |      |      |      |      |      |      |      |                                |
|-----------------------------------------------------------------------------------|------|------|------|------|------|------|------|------|------|------|------|------|------|------|------|------|------|--------------------------------|
| Citrus fruits<br>F,R,Fr                                                           | 487  | 424  | 313  | 400  | 437  | 316  | 387  | 444  | 406  | 438  | 487  | 329  | 432  | 458  | 396  | 338  | 379  | [1] 080510                     |
| Bananas F,R,Fr                                                                    | 274  | 274  | 178  | 249  | 270  | 189  | 272  | 277  | 239  | 245  | 290  | 188  | 263  | 254  | 257  | 201  | 227  | [1] 080300                     |
| Apples F,R,Fr                                                                     | 578  | 506  | 363  | 468  | 536  | 369  | 470  | 538  | 477  | 509  | 585  | 379  | 519  | 537  | 469  | 396  | 448  | [1] 080810                     |
| Pears F,R,Fr                                                                      | 590  | 516  | 370  | 478  | 547  | 377  | 479  | 549  | 487  | 520  | 597  | 387  | 530  | 548  | 479  | 404  | 457  | [1] 080820                     |
| Stone Fruits<br>F,R,Fr                                                            | 690  | 604  | 432  | 560  | 641  | 441  | 559  | 643  | 572  | 610  | 694  | 457  | 620  | 646  | 563  | 472  | 535  | [1] 080930                     |
| Olives                                                                            | 2895 | 2477 | 2755 | 2281 | 2755 | 1824 | 2246 | 2603 | 2336 | 2555 | 2900 | 2755 | 2526 | 2704 | 2330 | 1918 | 2186 | [1] 070990aa                   |
| Berries F,R,Fr                                                                    | 210  | 187  | 138  | 170  | 209  | 139  | 172  | 194  | 178  | 188  | 211  | 142  | 189  | 198  | 172  | 148  | 167  | [1] 081010                     |
| Other fruits<br>F,R,Fr                                                            | 217  | 181  | 129  | 170  | 190  | 134  | 176  | 203  | 170  | 170  | 213  | 138  | 203  | 181  | 169  | 141  | 161  | [1] 080719                     |
| Dr. fruit                                                                         | 4904 | 4196 | 2945 | 3842 | 4420 | 2965 | 3781 | 4414 | 3999 | 4317 | 4889 | 3106 | 4281 | 4555 | 3856 | 3218 | 3694 | [1] 080231 y<br>080232 (media) |
| Prep. or cons.<br>Fruit                                                           | 690  | 604  | 432  | 560  | 641  | 441  | 559  | 643  | 572  | 610  | 694  | 457  | 620  | 646  | 563  | 472  | 535  | [1] 080930                     |
| Leaf or stalk<br>vegetables F,R                                                   | 202  | 171  | 130  | 169  | 179  | 138  | 170  | 191  | 163  | 161  | 195  | 139  | 194  | 169  | 161  | 139  | 154  | [1] 070511                     |
| Cabbages F,R                                                                      | 293  | 250  | 188  | 245  | 261  | 198  | 247  | 278  | 238  | 236  | 285  | 202  | 282  | 248  | 235  | 202  | 225  | [1] 070410                     |
| Veg. cultivated<br>for their fruit<br>F,R                                         | 90   | 83   | 66   | 79   | 83   | 63   | 75   | 82   | 81   | 86   | 89   | 69   | 81   | 88   | 77   | 69   | 75   | [1] 070200                     |
| Root crops,<br>non-starchy<br>bulbs and<br>mushrooms F,<br>R                      | 321  | 266  | 199  | 284  | 283  | 218  | 273  | 309  | 254  | 250  | 306  | 216  | 328  | 260  | 248  | 215  | 236  | [1] 071220                     |
| Dr pulses and<br>vegetables                                                       | 3481 | 3011 | 2044 | 2669 | 3075 | 2031 | 2662 | 3117 | 2859 | 3098 | 3482 | 2139 | 3041 | 3302 | 2695 | 2226 | 2592 | [1] 071320                     |
| Fr vegetables                                                                     | 513  | 412  | 316  | 433  | 444  | 340  | 421  | 477  | 393  | 390  | 481  | 337  | 500  | 405  | 385  | 338  | 369  | [1] 070820                     |
| Prep. or tinned<br>pulses and<br>veg., and other<br>prod. using<br>pulses or veg. | 3074 | 2717 | 1997 | 2497 | 2882 | 2025 | 2486 | 2841 | 2607 | 2735 | 3063 | 2130 | 2756 | 2864 | 2568 | 2153 | 2414 | [1] 070920                     |

|                                                       |       |       |       |       |       |       |       |       |       |       |       |       |       |       |       |       |       |                                                                      |
|-------------------------------------------------------|-------|-------|-------|-------|-------|-------|-------|-------|-------|-------|-------|-------|-------|-------|-------|-------|-------|----------------------------------------------------------------------|
| Potatoes                                              | 248   | 203   | 149   | 216   | 214   | 162   | 222   | 239   | 198   | 198   | 237   | 168   | 254   | 202   | 192   | 168   | 185   | [1] 070190                                                           |
| Prod. derived from potatoes, tapioca and other tubes. | 925   | 925   | 925   | 925   | 925   | 925   | 925   | 925   | 925   | 925   | 925   | 925   | 925   | 925   | 925   | 925   | 925   | [6] Potato crisps (200 g)                                            |
| Sugar                                                 | 1509  | 1316  | 897   | 1192  | 1251  | 907   | 1200  | 1393  | 1169  | 1316  | 1477  | 998   | 1350  | 1391  | 1215  | 985   | 1143  | [1] 170111 y 170191 (average)                                        |
| Jam, marmalade and honey.                             | 2725  | 2725  | 2725  | 2725  | 2725  | 2725  | 2725  | 2725  | 2725  | 2725  | 2725  | 2725  | 2725  | 2725  | 2725  | 2725  | 2725  | [7]                                                                  |
| Chocolate bar                                         | 17190 | 17190 | 17190 | 17190 | 17190 | 17190 | 17190 | 17190 | 17190 | 17190 | 17190 | 17190 | 17190 | 17190 | 17190 | 17190 | 17190 | [1] 180500 (global average)                                          |
| Confectionery prod.                                   | 1509  | 1316  | 897   | 1192  | 1251  | 907   | 1200  | 1393  | 1169  | 1316  | 1477  | 998   | 1350  | 1391  | 1215  | 985   | 1143  | [1] 170111 y 170191 (average)                                        |
| Ice Creams                                            | 1903  | 1903  | 1903  | 1903  | 1903  | 1903  | 1903  | 1903  | 1903  | 1903  | 1903  | 1903  | 1903  | 1903  | 1903  | 1903  | 1903  | [7]                                                                  |
| Other sugar-based prod.                               | 1509  | 1316  | 897   | 1192  | 1251  | 907   | 1200  | 1393  | 1169  | 1316  | 1477  | 998   | 1350  | 1391  | 1215  | 985   | 1143  | [1] 170111 y 170191 (average)                                        |
| Coffee                                                | 17411 | 17411 | 17411 | 17411 | 17411 | 17411 | 17411 | 17411 | 17411 | 17411 | 17411 | 17411 | 17411 | 17411 | 17411 | 17411 | 17411 | [1] 090111, 090112, 090121 y 090122 (media)                          |
| Tea and infusions                                     | 8856  | 8856  | 8856  | 8856  | 8856  | 8856  | 8856  | 8856  | 8856  | 8856  | 8856  | 8856  | 8856  | 8856  | 8856  | 8856  | 8856  | [1] 0902                                                             |
| Cocoa                                                 | 15636 | 15636 | 15636 | 15636 | 15636 | 15636 | 15636 | 15636 | 15636 | 15636 | 15636 | 15636 | 15636 | 15636 | 15636 | 15636 | 15636 | [1] 180310 y 180500 (media)                                          |
| Mineral water                                         | 1.39  | 1.39  | 1.39  | 1.39  | 1.39  | 1.39  | 1.39  | 1.39  | 1.39  | 1.39  | 1.39  | 1.39  | 1.39  | 1.39  | 1.39  | 1.39  | 1.39  | [8]                                                                  |
| Carbonated or still soft drinks                       | 478   | 478   | 478   | 478   | 478   | 478   | 478   | 478   | 478   | 478   | 478   | 478   | 478   | 478   | 478   | 478   | 478   | [9] Carbonated drinks (169-309 L/0.5 L)                              |
| Fruit juices                                          | 954   | 835   | 616   | 779   | 835   | 625   | 770   | 878   | 794   | 850   | 961   | 642   | 854   | 893   | 779   | 666   | 748   | [1] 080510, 080540, 080590, 200930, 080810, 080610, 080430 (average) |



|                                                 |      |      |      |      |      |      |      |      |      |      |      |      |      |      |      |      |      |                              |
|-------------------------------------------------|------|------|------|------|------|------|------|------|------|------|------|------|------|------|------|------|------|------------------------------|
| Vegetable<br>juices                             | 280  | 259  | 206  | 246  | 259  | 197  | 233  | 257  | 253  | 268  | 277  | 216  | 254  | 275  | 241  | 217  | 235  | [1] 070200<br>(Tomato juice) |
| Spirits and<br>liquors                          | 1957 | 1725 | 1281 | 1587 | 1561 | 1318 | 1622 | 1822 | 1628 | 1720 | 1987 | 1317 | 1781 | 1818 | 1615 | 1388 | 1567 | [1] 220410                   |
| Grape wines<br>and other<br>fermented<br>fruits | 1714 | 1511 | 1122 | 1390 | 1368 | 1154 | 1421 | 1596 | 1426 | 1506 | 1741 | 1153 | 1560 | 1592 | 1415 | 1216 | 1373 | [1] 080610                   |
| Other wines                                     | 1957 | 1725 | 1281 | 1587 | 1561 | 1318 | 1622 | 1822 | 1628 | 1720 | 1987 | 1317 | 1781 | 1818 | 1615 | 1388 | 1567 | [1] 080610,<br>sparkling     |
| Beer                                            | 324  | 272  | 277  | 257  | 277  | 193  | 261  | 304  | 251  | 268  | 338  | 198  | 296  | 292  | 244  | 204  | 238  | [1] 110710                   |

**Notes:** F = Fresh; R = Refrigerated; Fr = Frozen; Dr=Dried; Sa=Salted; Sm= Smoked; AND= Andalucía; AR=Aragón; AST= Asturias; IBAL=Islas Baleares; ICAN= Islas Canarias; CAN=Cantabria; CyL=Castilla y León; CLM = Castilla-La Mancha; CAT= Cataluña; CVA= Comunidad Valenciana; EXT = Extremadura; GAL= Galicia; CAM=Comunidad de Madrid; RM=Región de Murcia; NAV=Navarra; PVA=País Vasco; LR =La Rioja

#### References for Table S4

- 1 Mekonnen, MM; Hoekstra, AY The green, blue and grey water footprint of crops and derived crop products *Hydrol Earth Syst Sci* **2011**, *15*, 1577–1600, doi:105194/hess-15-1577-2011
- 2 BCFN *Double Pyramid 2016 - A more sustainable future depend on us Technical Database*; BCFN: Parma, Italy, 2016;
- 3 Mekonnen, M; Hoekstra, A A Global Assessment of the Water Footprint of Farm Animal Products *Ecosystems* **2012**, *15*, 401–415
- 4 Vanham, D; Mak, TN; Gawlik, BM Urban food consumption and associated water resources: The example of Dutch cities *Sci Total Environ* **2016**, *565*, 232–239, doi:101016/JSCITOTENV201604172
- 5 Jefferies, D; Muñoz, I; Hodges, J; King, VJ; Aldaya, M; Ercin, AE; Milà i Canals, L; Hoekstra, AY Water Footprint and Life Cycle Assessment as approaches to assess potential impacts of products on water consumption Key learning points from pilot studies on tea and margarine *J Clean Prod* **2012**, *33*, 155–166, doi:101016/j.jclepro201204015
- 6 Hoekstra, AY; Chapagain, AK Water footprints of nations: Water use by people as a function of their consumption pattern In *Proceedings of the Water Resources Management*; Springer, 2006; Vol 21, pp 35–48
- 7 Water Footprint Network Product Gallery Available online: <https://waterfootprintorg/en/resources/interactive-tools/product-gallery/> (accessed on Feb 19, 2021)
- 8 IBWA *Water Use Benchmarking Study: Executive Summary*; Alexandria (VI), USA, 2013;
- 9 Ercin, AE; Aldaya, MM; Hoekstra, AY Corporate Water Footprint Accounting and Impact Assessment: The Case of the Water Footprint of a Sugar-Containing Carbonated Beverage *Water Resour Manag* **2011**, *25*, 721–741, doi:101007/s11269-010-9723-8.

**Table S5. Carbon footprint of 5-digit COICOP/HBS food categories used.**

| 5-digit COICOP | Food/Drink                                       | Carbon footprint (kg CO <sub>2</sub> -eq/kg) | Ref. | Notes                                                                        |
|----------------|--------------------------------------------------|----------------------------------------------|------|------------------------------------------------------------------------------|
| 01111          | Rice                                             | 2.75                                         | [1]  | Reference 20 (Italy)                                                         |
| 01112          | Bread                                            | 0.93                                         | [1]  | Reference 7 (Denmark)                                                        |
| 01113          | Other bakery products                            | 2.25                                         | [1]  | Reference 357 (UK)                                                           |
| 01114          | Pasta food                                       | 0.85                                         | [1]  | Reference 1264 (Italy)                                                       |
| 01115          | Pastry-cook products                             | 2.61                                         | [1]  | Reference 160 (UK)                                                           |
| 01116          | Sandwich                                         | 0.55                                         | [1]  | Reference 1235 (France)                                                      |
| 01117          | Other cereal products                            | 0.47                                         | [1]  | Reference 1064 (Sweden)                                                      |
| 01121          | Bovine meat (F,R,Fr)                             | 22.35                                        | [1]  | References 1349, 1350 (Italy)                                                |
| 01122          | Pork meat (F,R,Fr)                               | 8.70                                         | [1]  | Reference 1433 (Spain)                                                       |
| 01123          | Ovine and caprine meat (F,R,C)                   | 34.03                                        | [1]  | Reference 1187 (France)                                                      |
| 01124          | Poultry meat (F,R,C)                             | 2.46                                         | [1]  | Reference 1324 (Portugal)                                                    |
| 01125          | Dr, Sa, Sm meat and offal                        | 10.70                                        | [1]  | Reference 1432 (Spain)                                                       |
| 01126          | Other pres., proc. and prep meat                 | 17.80                                        | [1]  | Reference 1456 (Spain)                                                       |
| 01127          | Other edible meat (F,C)                          | 4.70                                         | [2]  | France                                                                       |
| 01128          | Trimnings, fetlock joints and inferior meat cuts | 17.80                                        | [1]  | Reference 1456 (Spain)                                                       |
| 01131          | Fish F,R                                         | 6.88                                         | [3]  | Page 1610 (Average for different methods)                                    |
| 01132          | Fr Fish                                          | 9.57                                         | [1]  | Reference 1004 (Spain)                                                       |
| 01133          | Crustacean and molluscs F,R,Fr                   | 8.00                                         | [1]  | Reference 1034, 1035 (average)                                               |
| 01134          | Dr,Sa,Sm Fish and seafood                        | 4.11                                         | [4]  | USA                                                                          |
| 01135          | Other proc., pres. or prep. fish and seafood     | 6.06                                         | [5]  | USA                                                                          |
| 01141          | Full cream milk                                  | 1.50                                         | [1]  | Reference 1427 (Italy)                                                       |
| 01142          | Semi and fully skimmed milk                      | 0.98                                         | [1]  | Reference 278 (Spain)                                                        |
| 01143          | Canned milk                                      | 3.20                                         | [4]  | USA                                                                          |
| 01144          | Yoghurt and fermented milk                       | 2.02                                         | [4]  | USA                                                                          |
| 01145          | Cheese, curd                                     | 7.49                                         | [1]  | Reference 58 (Sweden)                                                        |
| 01146          | Other milk-based prod.                           | 8.30                                         | [1]  | Reference 1351 (Italy)                                                       |
| 01147          | Eggs                                             | 2.27                                         | [1]  | Reference 877 (Holland)                                                      |
| 01151          | Butter                                           | 7.20                                         | [1]  | Reference 251 (France)                                                       |
| 01152          | Margarine and other veg. fats                    | 1.66                                         | [1]  | Reference 154 (France)                                                       |
| 01153          | Olive oil                                        | 1.20                                         | [1]  | Reference 155 (Spain)                                                        |
| 01154          | Other edible oils                                | 0.80                                         | [1]  | Reference 1084 (Portugal)                                                    |
| 01155          | Other animal fats                                | 11.92                                        | [4]  | USA                                                                          |
| 01161          | Citrus fruits F,R,Fr                             | 1.00                                         | [1]  | Reference 1068 (Italy)                                                       |
| 01162          | Bananas F,R,Fr                                   | 1.25                                         | [1]  | Reference 1281 (Ecuador)                                                     |
| 01163          | Apples F,R,Fr                                    | 0.20                                         | [1]  | Reference 1396 (Italy)                                                       |
| 01164          | Pears F,R,Fr                                     | 0.29                                         | [4]  | USA                                                                          |
| 01165          | Stone Fruits F,R,Fr                              | 0.36                                         | [4]  | USA                                                                          |
| 01166          | Olives                                           | 0.63                                         | [1]  | Reference 404 (Italy)                                                        |
| 01167          | Berries F,R,Fr                                   | 0.35                                         | [4]  | USA                                                                          |
| 01168          | Other fruits F,R,Fr                              | 1.58                                         | [1]  | Reference 634 (Italy)                                                        |
| 01169          | Dr. fruit                                        | 1.17                                         | [4]  | USA                                                                          |
| 01160          | Prep. or cons. Fruit                             | 1.08                                         | [4]  | USA                                                                          |
| 01171          | Leaf or stalk vegetables F,R                     | 0.45                                         | [1]  | Reference 34 (Spain)                                                         |
| 01172          | Cabbages F,R                                     | 0.28                                         | [1]  | Reference 785 (Holland)                                                      |
| 01173          | Veg. cultivated for their fruit F,R              | 1.43                                         | [1]  | Reference 232, 346 (Spain) – Average from orchard and greenhouse cultivation |
| 01174          | Root crops, non-starchy bulbs and mushrooms F, R | 0.17                                         | [1]  | Reference 802 (UK)                                                           |
| 01175          | Dr pulses and vegetables                         | 0.78                                         | [4]  | USA                                                                          |

| 5-digit COICOP | Food/Drink                                                            | Carbon footprint (kg CO <sub>2</sub> -eq/kg) | Ref. | Notes                                                                                             |
|----------------|-----------------------------------------------------------------------|----------------------------------------------|------|---------------------------------------------------------------------------------------------------|
| 01176          | Fr vegetables                                                         | 1.44                                         | [4]  | USA                                                                                               |
| 01177          | Prep. or tinned pulses and veg., and other prod. using pulses or veg. | 1.08                                         | [4]  | USA                                                                                               |
| 01178          | Potatoes                                                              | 0.24                                         | [1]  | Reference 1402 (Italy)                                                                            |
| 01179          | Prod. derived from potatoes, tapioca and other tubes.                 | 1.44                                         | [4]  | USA                                                                                               |
| 01181          | Sugar                                                                 | 0.20                                         | [1]  | Reference 16 (Brazil) and 373 (Germany)                                                           |
| 01182          | Jam, marmalade and honey.                                             | 2.50                                         | [1]  | Reference 1454 (Argentina)                                                                        |
| 01183          | Chocolate bar                                                         | 3.60                                         | [1]  | Reference 604                                                                                     |
| 01184          | Confectionery prod.                                                   | 0.20                                         | [1]  | Reference 16 (Brazil) and 373 (Germany)                                                           |
| 01185          | Ice Creams                                                            | 2.14                                         | [6]  | Unilever ice-cream                                                                                |
| 01186          | Other sugar-based prod.                                               | 0.20                                         | [1]  | Reference 16 (Brazil) and 373 (Germany)                                                           |
| 01211          | Coffee                                                                | 1.20                                         | [7]  | Reference Coffee green bean production - arabica (CO <sub>2</sub> land transformation and fossil) |
| 01212          | Tea and infusions                                                     | 0.84                                         | [7]  | Reference Tea production, dried                                                                   |
| 01213          | Cocoa                                                                 | 4.98                                         | [8]  | Nicaragua                                                                                         |
| 01221          | Mineral water                                                         | 0.32                                         | [9]  | Still water                                                                                       |
| 01222          | Carbonated or still soft drinks                                       | 0.17                                         | [10] | Carbonated soft drink. 1 L (1,03 g/mL)                                                            |
| 01223          | Fruit juice                                                           | 0.90                                         | [1]  | Reference 596 (Italy)                                                                             |
| 01224          | Vegetable juice                                                       | 0.57                                         | [11] | Turkey                                                                                            |
| 02111          | Spirits and liquors                                                   | 3.91                                         | [12] | Whiskey (USA). 75 cl bottle (Density = 0,939 g/mL)                                                |
| 02121          | Grape wines and other fermented fruits                                | 1.83                                         | [13] | (Finland)                                                                                         |
| 02122          | Other wines                                                           | 2.09                                         | [14] | 0,75 cl bottle (Density = 0,99 g/mL)                                                              |
| 02131          | Beer                                                                  | 0.94                                         | [13] | (Finland)                                                                                         |

F = Fresh; R = Refrigerated; Fr = Frozen; Dr=Dried; Sa=Salted; Sm= Smoked

## References for Table S5

1. BCFN *Double Pyramid 2016 - A more sustainable future depend on us. Technical Database*; BCFN: Parma, Italy, 2016;
2. Clune, S.; Crossin, E.; Verghese, K. Systematic review of greenhouse gas emissions for different fresh food categories. *J. Clean. Prod.* **2017**, *140*, 766–783.
3. Iribarren, D.; Vázquez-Rowe, I.; Hospido, A.; Moreira, M.T.; Feijoo, G. Estimation of the carbon footprint of the Galician fishing activity (NW Spain). *Sci. Total Environ.* **2010**, *408*, 5284–5294.
4. Heller, M.C.; Keoleian, G.A. Greenhouse Gas Emission Estimates of U.S. Dietary Choices and Food Loss. *J. Ind. Ecol.* **2015**, *19*, 391–401, doi:10.1111/jiec.12174.
5. EWG *Meat eater's guide to climate change and health*; Washington D.C., USA, 2011;
6. Zheng, W. *The carbon footprint of ice cream and its mitigating options for Unilever in China*; Groningen, the Netherlands, 2010;
7. Wernet, G.; Bauer, C.; Steubing, B.; Reinhard, J.; Moreno-Ruiz, E.; Weidema, B. The ecoinvent database version 3 (part I): overview and methodology. *Int. J. Life Cycle Assess.* **2016**, *21*, 1218–1230, doi:10.1007/s11367-016-1087-8.
8. Mena Soto, K. *Compendio de experiencias en la mitigación de Gas de Efecto Invernadero (GEI) para la agricultura y ganadería*; Instituto Interamericano de Cooperación para la Agricultura (IICA): San José, Costa Rica., 2015;
9. Jungbluth, N. *Comparison of the environmental impact of drinking water vs. bottled mineral water*; Uster, Switzerland, 2006;
10. BIER *Research on the Carbon Footprint of Carbonated Soft Drinks*; St. Paul (MN), USA., 2012;
11. Karakaya, A.; Özilgen, M. Energy utilization and carbon dioxide emission in the fresh, paste, whole-peeled, diced, and juiced tomato production processes. *Energy* **2011**, *36*, 5101–5110, doi:10.1016/j.energy.2011.06.007.
12. BIER *Research on the Carbon Footprint of Spirits*; St. Paul (MN), USA., 2012;
13. Mattila, T.; Leskinen, P.; Soimakallio, S.; Sironen, S. Uncertainty in environmentally conscious decision making: beer or wine? *Int. J. Life Cycle Assess.* **2012**, *17*, 696–705, doi:10.1007/s11367-012-0413-z.
14. Club Asturiano de Calidad; CITAGRO; CETIEX *Sectores del Vino y la Sidra. Informe final.*; Llanera (Asturias), España, 2013;



**Table S6. Parameters of frequency and weight of daily recommended portions, and the resulting annual intake calculated for an omnivorous healthy diet**

| Food                     | Portion<br>(crude and<br>net weight) | Recommended<br>frequency                                          | Average intake<br>(kg/person/year) | Notes                                                                             |
|--------------------------|--------------------------------------|-------------------------------------------------------------------|------------------------------------|-----------------------------------------------------------------------------------|
| Pasta                    | 60-80 g                              | 4-6 daily<br>portions                                             | 12.8                               | Half a portion = 70 g                                                             |
| Bread                    | 40-60 g                              |                                                                   | 65.7                               | 3 portions = 60 g                                                                 |
| Rice                     | 60-80 g                              |                                                                   | 12.8                               | Half a portion = 70 g                                                             |
| Potatoes                 | 150-200 g                            |                                                                   | 73.0                               | 1 portion = 200 g                                                                 |
| Vegetables               | 150-200 g                            | ≥ 2 daily<br>portions                                             | 146                                | 400 g/day (2 portions)                                                            |
| Fruit                    | 120-200 g                            | ≥ 3 daily<br>portions                                             | 175.2                              | 480 g/day (3 portions of 160 g/day)                                               |
| Olive oil                | 10 mL                                | 3-6 daily<br>portions                                             | 13.4                               | 4 daily portions (Density = 0,92 g/mL (Charrondiere et al. 2012))                 |
| Milk                     | 200-250 mL                           | 2-4 daily<br>portions                                             | 75.2                               | 1 portion/day = 200 mL (Density = 1,03 g/mL (Charrondiere et al. 2012))           |
| Yoghourt                 | 200-250 g                            |                                                                   | 73.0                               | 1 portion/day (200 g)                                                             |
| Cured cheese             | 40-60 g                              |                                                                   | 6.0                                | 0,33 portions = 50 g                                                              |
| Fresh cheese             | 80-125 g                             |                                                                   | 24.7                               | 0,66 portions = 102 g                                                             |
| Fish                     | 125-150 g                            | 3-4<br>portions/week                                              | 28.6                               | 4 weekly portions = 137 g                                                         |
| Lean meat and<br>poultry | 100-125 g                            | Each one 3-4<br>portions/week                                     | 26.0                               | 4 weekly portions = 125 g                                                         |
| Eggs                     | 53-63 g                              |                                                                   | 6.0                                | 2 weekly portions                                                                 |
| Fatty meat<br>and inlay  | < 50-60 g                            | Occasional and<br>moderate                                        | 2.6                                | 4 monthly portions                                                                |
| Pulses                   | 60-80 g                              | 2-4 per week                                                      | 10.9                               | 3 weekly portions                                                                 |
| Dried fruit              | 20-30 g                              | 3-7 per week                                                      | 6.5                                | 5 weekly portions                                                                 |
| Water                    | 200 mL                               | 4-8 daily<br>portions                                             | 437.6                              | Density (15°C) = 0,999 g/mL (Haynes et al. 2016)                                  |
| Wine                     | 100 mL                               | 1 daily portion<br>(optional and<br>moderate, only<br>for adults) | 5.3                                | Half of the weekends of the year (Density = 1,01 g/mL (Charrondiere et al. 2012)) |
| Beer                     | 200 mL                               |                                                                   | 10.4                               | Half of the weekends of the year (Density = 1 g/mL (Charrondiere et al. 2012))    |

**Source:** Weight, portion and recommended frequency (SENC 2004). Annual intakes and assumptions about portions associated (own elaboration).

**Table S7. Parameters of frequency and weight of daily recommended portions, and the resulting annual intake calculated for an ovo-lacto-vegetarian healthy diet**

| Food/Drink  | Portion<br>(crude and<br>net) | Recommended<br>frequency                                          | Average intake<br>(kg/persona/year) | Notes                                                                             |
|-------------|-------------------------------|-------------------------------------------------------------------|-------------------------------------|-----------------------------------------------------------------------------------|
| Pasta       | 40 g                          | 5-8 portions<br>(if pulses inc.)                                  | 7.3                                 | Half a portion daily                                                              |
| Bread       | 60 g                          |                                                                   | 65.7                                | 3 daily portions                                                                  |
| Rice        | 40 g                          |                                                                   | 7.3                                 | Half a portion daily                                                              |
| Potatoes    | 200 g                         |                                                                   | 73.0                                | 1 daily portion (200 g)                                                           |
| Vegetables  | 200 g                         | ≥ 2 daily<br>portions                                             | 146                                 | 2 portions                                                                        |
| Fruit       | 200 g                         | ≥ 3 daily<br>portions                                             | 219                                 | 3 daily portions                                                                  |
| Olive oil   | 10 mL                         | 3-6 daily<br>portions                                             | 13.4                                | 4 daily portions (Density = 0,92 g/mL (Charrondiere et al. 2012))                 |
| Milk        | 200 mL                        | 2 daily portions                                                  | 75.2                                | 1 daily portion 200 mL (Density = 1,03 g/mL (Charrondiere et al. 2012))           |
| Yoghourt    | 125 g                         |                                                                   | 22.8                                | Half a portion daily                                                              |
| Cheese      | 40-60 g                       | 3 weekly<br>portions                                              | 6.0                                 | Half a portion daily                                                              |
| Eggs        | 53-63 g                       |                                                                   | 4.5                                 |                                                                                   |
| Pulses      | 60 g                          | 2 daily portions                                                  | 6.2                                 |                                                                                   |
| Dried fruit | 20-30 g                       | 3-7<br>portions/week                                              | 5.2                                 | 4 weekly portions                                                                 |
| Water       | 200 mL                        | 4-8 daily<br>portions                                             | 437.6                               | Density (15°C) = 0,999 g/mL (Haynes et al. 2016)                                  |
| Wine        | 100 mL                        | 1 daily portion<br>(optional and<br>moderate, only<br>for adults) | 5.3                                 | Half of the weekends of the year (Density = 1,01 g/mL (Charrondiere et al. 2012)) |
| Beer        | 200 mL                        |                                                                   | 10.4                                | Half of the weekends of the year (Density = 1 g/mL (Charrondiere et al. 2012))    |

**Source:** Weight, portion and recommended frequency (Menal-Puey and Marques-Lopes 2017). Annual intakes and assumptions about portions associated (own elaboration).
